# Supplementary material for: Molecular dissection of the valproic acid effects on glioma cells
Source: PubMed Central journal article supplement (PMC5325342; doi:10.18632/oncotarget.11379), 2016-08-18
Supplement: oncotarget-07-62989-s001.pdf [file oncotarget-07-62989-s001.pdf]

# Molecular dissection of the valproic acid effects on glioma cells

## Supplementary Material

**Table S1: Primer sequences used for expression analysis performing real-time RT-PCR.**

| gene name         | forward primer               | reverse primer              |
|-------------------|------------------------------|-----------------------------|
| <b>CDKN1A/p21</b> | 5'-GCAGACCAGCATGACAGATTT-3'  | 5'-AAGATGTAGAGCGGGCCTTT-3'  |
| <b>GAPDH</b>      | 5'-CATGACAACCTTTGGTATCGTG-3' | 5'-GTCCACCACTGACACGTTG-3'   |
| <b>SLC2A13</b>    | 5'-GTCAGGTCAGAACGCCACTT-3'   | 5'-CTTGTAGCAGAAACCGCAGTC-3' |
| <b>SLC6A12</b>    | 5'-CTTGCCTGGGCTCTCTTCTA-3'   | 5'-TTCAGAAAGTCCGTGCAATG-3'  |
| <b>SLC17A7</b>    | 5'-TGGGGCTACATTGTCCTCA-3'    | 5'-CTGAGGGGATCAGCATGTTT-3'  |
| <b>SLC25A27</b>   | 5'-TGAATACACCACTTGAGGACAA-3' | 5'-TTTGATGACATCGGCTGGT-3'   |
| <b>SLC30A3</b>    | 5'-CTGCAGAGCTTTGGGGTACT-3'   | 5'-AAGGGCACAGATGGAGAAGA-3'  |
| <b>SLC44A3</b>    | 5'-CGGCATGGTTATTCCTGTTC-3'   | 5'-ACATGTTGCCAAAGCTGTCA-3'  |

**Table S2: Overview on the number of H3ac-enriched promoter regions, transcriptionally upregulated genes and an overlap of both after VPA treatment.** Provided is the number of regions/genes per cell line using different fold change cut-offs ( $\geq 2$ ,  $\geq 3$ ,  $\geq 4$  and  $\geq 5$ ). P-value cut-off is  $<0.01$  for all comparisons. Additionally, at the bottom of the table the number of genes and SLC transporters is displayed that are upregulated in at least four out of the seven adherent and four out of the seven glioblastoma stem cell lines.

| cell line                                                                  | ChIP-Seq                     |                                       | RNA-Seq                                     |                                             |                                             |                                             | list comparison<br>ChIP & RNA (FC $\geq 2$ ) | list comparison<br>ChIP & RNA (FC $\geq 3$ ) | list comparison<br>ChIP & RNA (FC $\geq 4$ ) | list comparison<br>ChIP & RNA (FC $\geq 5$ ) |
|----------------------------------------------------------------------------|------------------------------|---------------------------------------|---------------------------------------------|---------------------------------------------|---------------------------------------------|---------------------------------------------|----------------------------------------------|----------------------------------------------|----------------------------------------------|----------------------------------------------|
|                                                                            | enriched regions<br>(p<0.01) | Promoter correlation<br>-1000 to 0 bp | upregulated genes<br>(p<0.01, FC $\geq 2$ ) | upregulated genes<br>(p<0.01, FC $\geq 3$ ) | upregulated genes<br>(p<0.01, FC $\geq 4$ ) | upregulated genes<br>(p<0.01, FC $\geq 5$ ) |                                              |                                              |                                              |                                              |
| <b>T98G</b>                                                                | 78,539                       | 7,578                                 | 3,234                                       | 2,183                                       | 1,753                                       | 1,508                                       | 802                                          | 499                                          | 380                                          | 310                                          |
| <b>TP365MG</b>                                                             | 586,695                      | 39,909                                | 3,284                                       | 2,202                                       | 1,795                                       | 1,572                                       | 2,038                                        | 1,324                                        | 1,067                                        | 929                                          |
| <b>U87MG</b>                                                               | 759,187                      | 53,630                                | 3,780                                       | 2,631                                       | 2,127                                       | 1,813                                       | 2,570                                        | 1,723                                        | 1,375                                        | 1,178                                        |
| <b>U118MG</b>                                                              | 533,322                      | 33,245                                | 4,149                                       | 2,855                                       | 2,281                                       | 1,952                                       | 2,356                                        | 1,588                                        | 1,269                                        | 1,085                                        |
| <b>U251MG</b>                                                              | 130,235                      | 9,973                                 | 5,532                                       | 3,752                                       | 2,871                                       | 2,362                                       | 1,953                                        | 1,289                                        | 954                                          | 769                                          |
| <b>U373MG</b>                                                              | 1,008,547                    | 60,082                                | 3,095                                       | 2,159                                       | 1,769                                       | 1,524                                       | 2,240                                        | 1,536                                        | 1,253                                        | 1,086                                        |
| <b>HS683</b>                                                               | 630,964                      | 42,730                                | 2,719                                       | 1,800                                       | 1,461                                       | 1,271                                       | 1,811                                        | 1,161                                        | 920                                          | 793                                          |
| <b>NCH1425</b>                                                             | 103,423                      | 5,064                                 | 3,658                                       | 2,461                                       | 1,965                                       | 1,677                                       | 530                                          | 352                                          | 262                                          | 212                                          |
| <b>NCH421k</b>                                                             | 577,244                      | 25,497                                | 4,196                                       | 3,000                                       | 2,516                                       | 2,234                                       | 1,833                                        | 1,246                                        | 1,030                                        | 915                                          |
| <b>NCH465</b>                                                              | 201,424                      | 14,905                                | 3,375                                       | 1,990                                       | 1,449                                       | 1,176                                       | 1,294                                        | 731                                          | 517                                          | 413                                          |
| <b>NCH601</b>                                                              | 555,889                      | 35,143                                | 4,147                                       | 2,889                                       | 2,325                                       | 2,032                                       | 2,501                                        | 1,724                                        | 1,359                                        | 1,181                                        |
| <b>NCH636</b>                                                              | 441,038                      | 31,005                                | 2,653                                       | 1,686                                       | 1,288                                       | 1,076                                       | 1,512                                        | 921                                          | 687                                          | 566                                          |
| <b>NCH644</b>                                                              | 453,295                      | 27,450                                | 4,863                                       | 3,356                                       | 2,771                                       | 2,441                                       | 2,647                                        | 1,762                                        | 1,421                                        | 1,245                                        |
| <b>NCH660h</b>                                                             | 725,521                      | 48,981                                | 3,278                                       | 2,111                                       | 1,678                                       | 1,434                                       | 2,217                                        | 1,395                                        | 1,105                                        | 940                                          |
| upregulated in $\geq 4$ of 7 adherent and in $\geq 4$ of 7 stem cell lines |                              |                                       | 1,607                                       | 863                                         | 623                                         | 497                                         | 379                                          | 178                                          | 114                                          | 87                                           |
| upregulated SLC transporters                                               |                              |                                       | 48                                          | 23                                          | 19                                          | 16                                          | 16                                           | 8                                            | 6                                            | 4                                            |

**Table S3: Immunohistochemical staining scores for the six matched pairs of patient biopsy samples before and under VPA treatment.** Ranges for staining intensities arise from heterogeneous tissue samples. Numbers correspond to 0=no/minimal, 1=weak, 2=moderate/intermediate and 3=strong staining intensity. †, biopsy in recurrence not taken under but three years after VPA treatment. VPA doses provided are daily doses.

| patient no. | sex | before VPA |                                       |         | VPA dosis | under VPA      |                                       |         |          |
|-------------|-----|------------|---------------------------------------|---------|-----------|----------------|---------------------------------------|---------|----------|
|             |     | age        | diagnosis                             | SLC17A7 |           | SLC25A27       | diagnosis                             | SLC17A7 | SLC25A27 |
| 1           | f   | 26         | anaplastic oligoastrocytoma (WHO-III) | 3       | 1         | 1,500 mg       | anaplastic oligoastrocytoma (WHO-III) | 3       | 3        |
| 2           | f   | 67         | glioblastoma (WHO-IV)                 | 1       | 0         | 300 - 1,200 mg | glioblastoma (WHO-IV)                 | 1-2     | 3        |
| 3           | f   | 27         | astrocytoma (WHO-II)                  | 2       | 1         | 2,000 mg       | anaplastic oligoastrocytoma (WHO-III) | 1       | 2        |
| 4           | f   | 39         | anaplastic astrocytoma (WHO-III)      | 2       | 2         | 300 - 1,300 mg | anaplastic astrocytoma (WHO-III)†     | 0-3     | 0-2      |
| 5           | m   | 65         | glioblastoma (WHO-IV)                 | 0-1     | 0-2       | 900 - 1,300 mg | glioblastoma (WHO-IV)                 | 3       | 3        |
| 6           | m   | 31         | oligoastrocytoma (WHO-II)             | 3       | 3         | 600 mg         | anaplastic oligoastrocytoma (WHO-III) | 2       | 2        |
| CTRL        | m   | 64         | non-neoplastic brain tissue           | 1-2     | 1         |                |                                       |         |          |

**Table S4: Lists of genes used for gene set enrichment analysis (GSEA).**

**SLC TRANSPORTERS:** SLC17A7, SLC25A27, SLC30A3, SLC6A12, SLC44A3, SLC4A5, SLC24A6, SLC46A3, SLC12A6, SLC23A2, SLC2A13, SLC36A1, SLC40A1, SLC43A2, SLC4A8, SLC7A8.

**DOUBLE-STRAND BREAK REPAIR:** BLM, BRCA1, BRCA2, CHEK1, DMC1, FEN1, H2AFX, HUS1, LIG1, LIG4, MDC1, MLH1, MRE11A, NBN, PRKDC, RAD21, RAD50, RAD51, RAD51B, RAD51C, RAD51D, RAD52, RAD54L, RPA1, TP53BP1, XRCC2, XRCC2, XRCC3, XRCC4, XRCC5, XRCC6.

**MISMATCH REPAIR:** ABL1, EXO1, MLH1, MLH3, MSH2, MSH3, MSH4, MSH5, MSH6, PCNA, PMS1, PMS2, POLD3, TP73, TREX1.

**BASE EXCISION REPAIR:** ADPRT1, APEX1, APEX2, CCNO, FEN1, LIG1, LIG3, MBD4, MPG, MUTYH, NEIL1, NEIL2, NEIL3, NTHL1, OGG1, PARP1, PARP2, PARP3, PCNA, PNKP, POLB, RPA1, SIRT1, SMUG1, TDG, UNG, XRCC1.

**NUCLEOTIDE EXCISION REPAIR:** ATXN3, BRIP1, CCNH, CDK7, DDB1, DDB2, ERCC1, ERCC2, ERCC3, ERCC4, ERCC5, ERCC6, ERCC8, LIG1, MMS19, NTHL1, OGG1, PCNA, PNKP, POLL, RAD23A, RAD23B, RPA1, RPA3, SIRT1, SLK, TP53, XAB2, XPA, XPC, XPD.

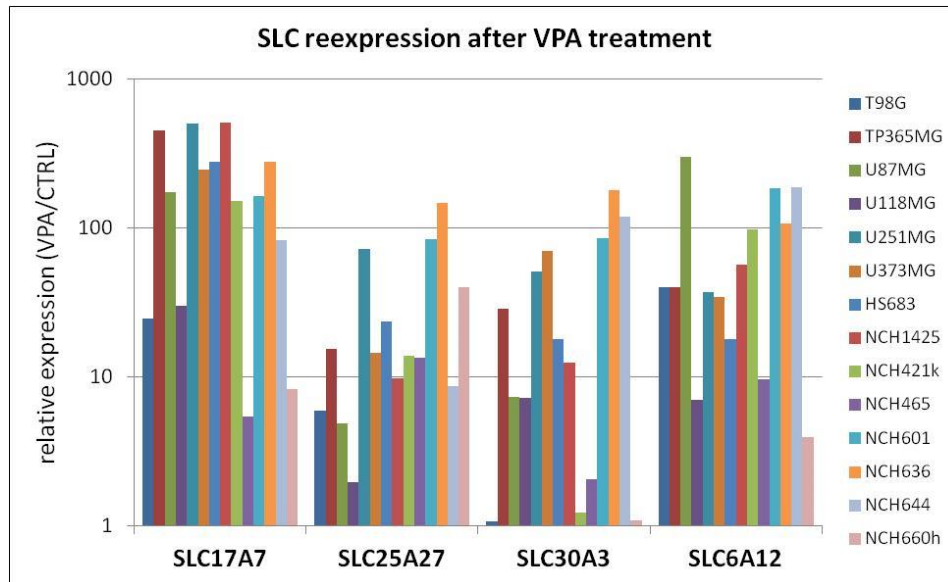

**Figure S1: Confirmation of SLC transporter reexpression after VPA treatment by real-time RT-PCR.** We exemplarily validated overexpression of the four transporters (SLC17A7, SLC25A27, SLC30A3 and SLC6A12) that had displayed the highest transcriptional upregulation on RNA-Seq.

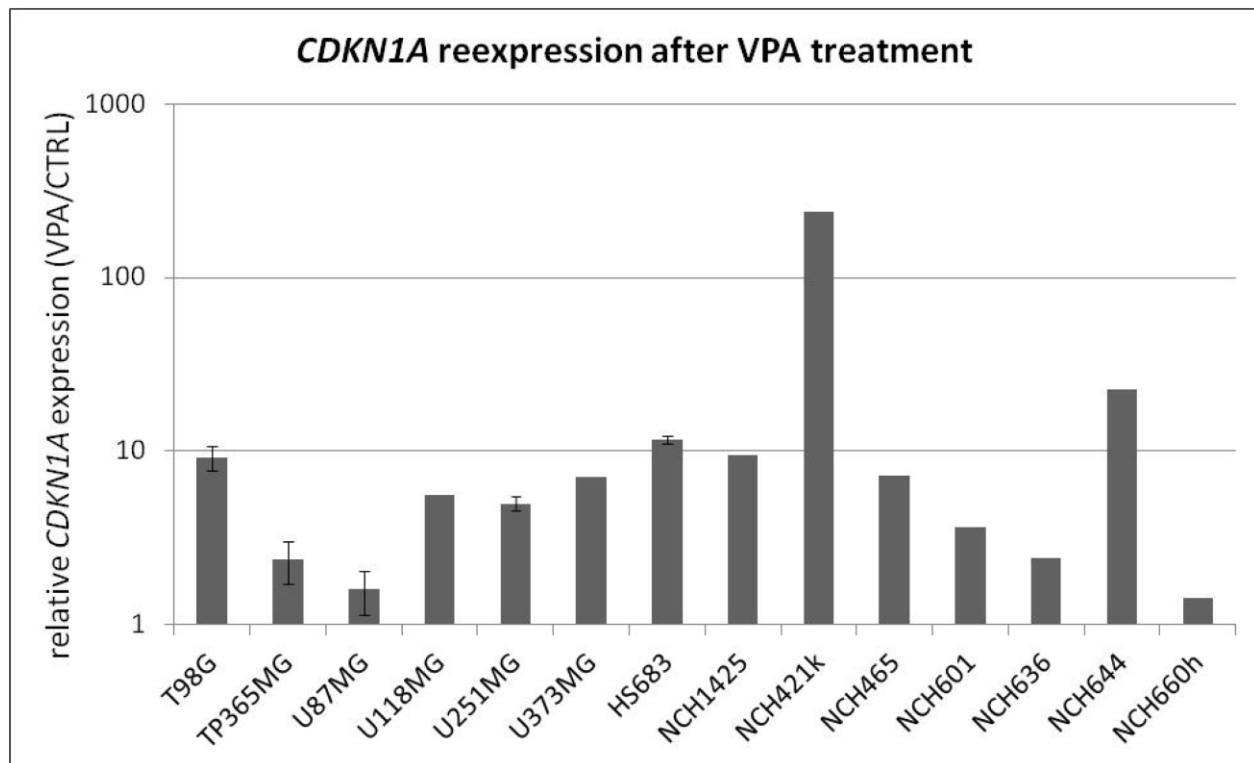

**Figure S2: Confirmation of reexpression of *CDKN1A* after VPA treatment by real-time RT-PCR.** These analyses confirm the upregulation observed on RNA-Seq with even all 14 cell lines displaying a VPA-induced transcriptional upregulation of cell cycle regulator *CDKN1A/p21* by this method.

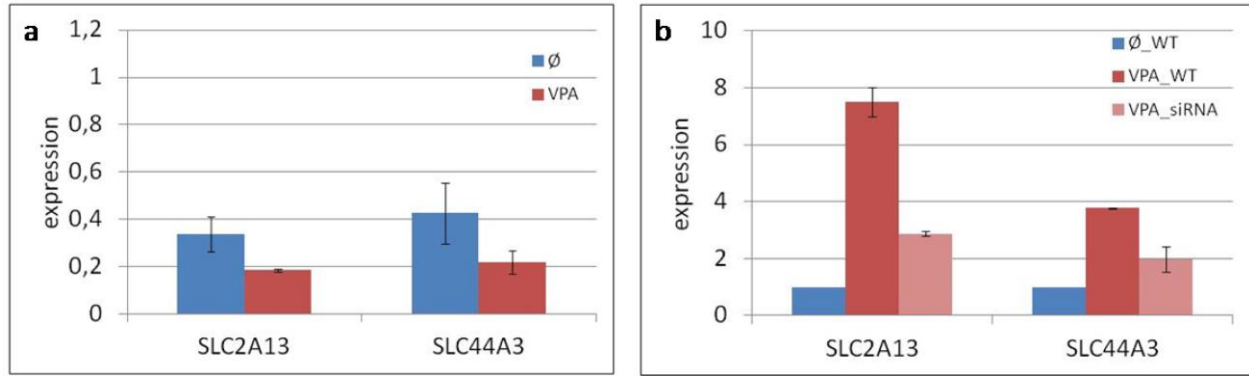

**Figure S3: siRNA-mediated silencing of SLC transporter expression.** (a) siRNA transfection itself worked sufficiently in the absence (blue) as well as in the presence (red) of VPA resulting in a reasonable knockdown in both situations (exemplarily analyzed for the SLC transporters SLC2A13 and SLC44A3). (b) VPA treatment (dark red) markedly increased SLC transporter expression compared to VPA-naive cells (blue). siRNA-mediated SLC transporter knockdown in VPA-treated cells (light red), however, did not suffice to decrease SLC transporter expression to the starting level measured in VPA-naive cells and therefore did only partially rescue the expression increase induced by VPA.
